# Supplementary material
Source: ML conference proceedings conference paper supplement (https://openreview.net/forum?id=BbGv8Lsql9)

$\theta \in [-0.5, 0.5]$ 

BETHE-OPT

 $l^1$ 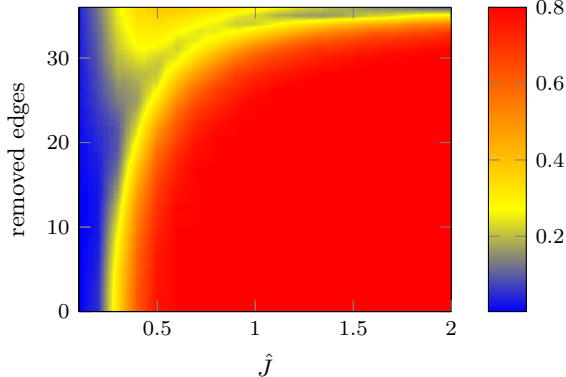

Supplement: supplementary_material [file attachment]

$$\theta \in [-0.5, 0.5]$$

CHOW-LIU

$$l^1$$

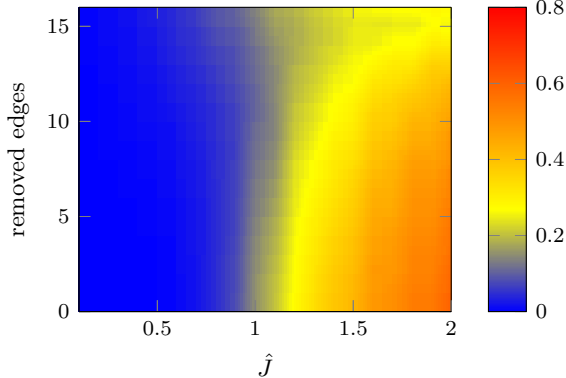

Supplement: supplementary_material [file attachment]

$\theta \in [-0.2, 0.2]$

BETHE-OPT

$l^1$

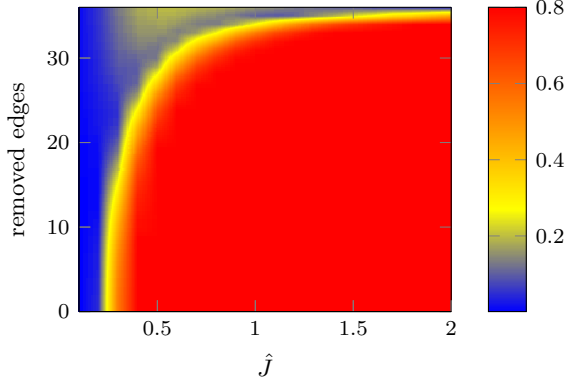

Supplement: supplementary_material [file attachment]

$$\theta \in [-0.2, 0.2]$$

RANDOM

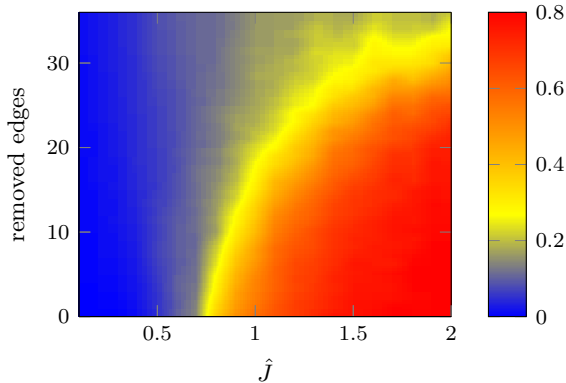

Supplement: supplementary_material [file attachment]

$$\theta \in [-0.2, 0.2]$$

CHOW-LIU

$$l^1$$

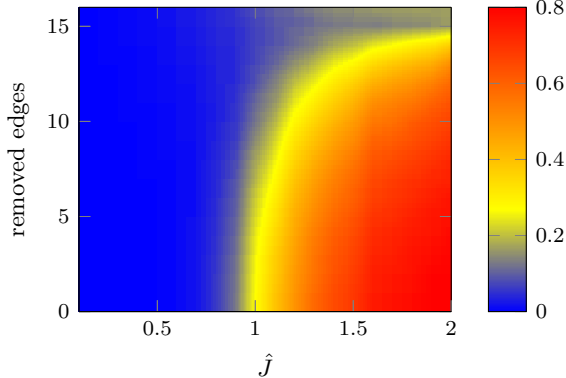

Supplement: supplementary_material [file attachment]

$$\theta \in [-0.5, 0.5]$$

RANDOM

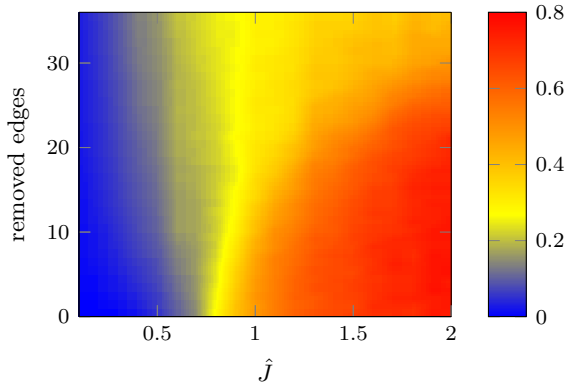

Supplement: supplementary_material [file attachment]

$$\theta \in [-0.2, 0.2]$$

CHOW-LIU

$$l^1$$

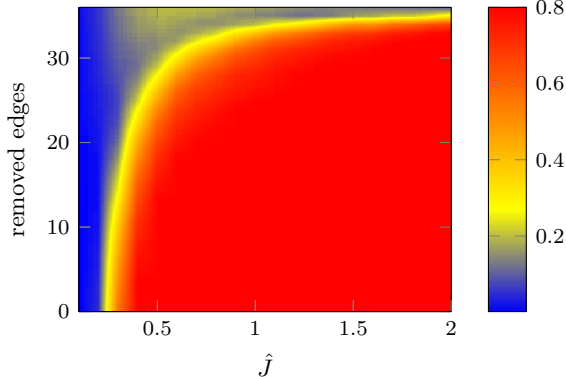

Supplement: supplementary_material [file attachment]

$$\theta \in [-0.2, 0.2]$$

CHOW-LIU

$$l^1$$

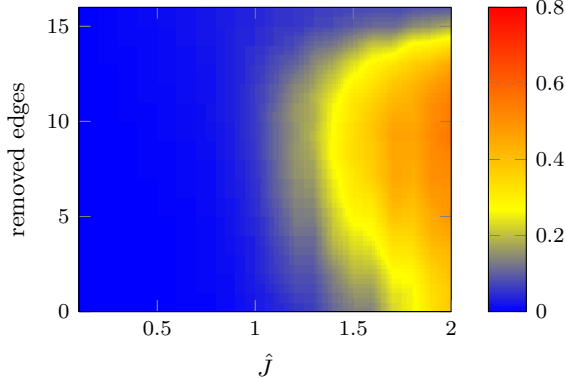

Supplement: supplementary_material [file attachment]

$\theta \in [-0.2, 0.2]$

BETHE-OPT

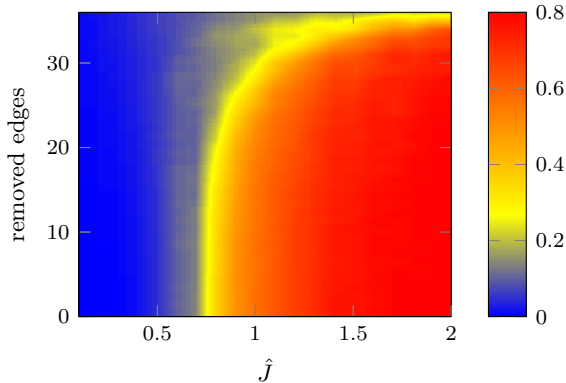

Supplement: supplementary_material [file attachment]

$$\theta \in [-0.2, 0.2]$$

CHOW-LIU

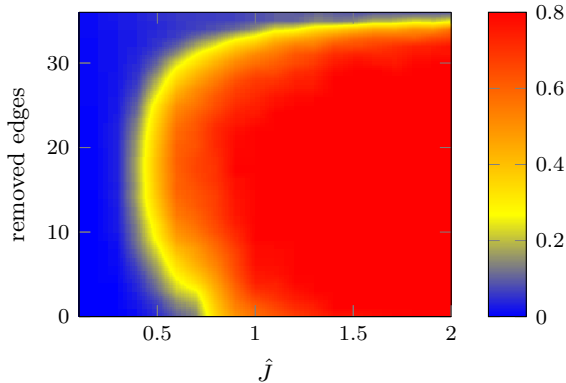

Supplement: supplementary_material [file attachment]

$$\theta \in [-0.5, 0.5]$$

CHOW-LIU

$$l^1$$

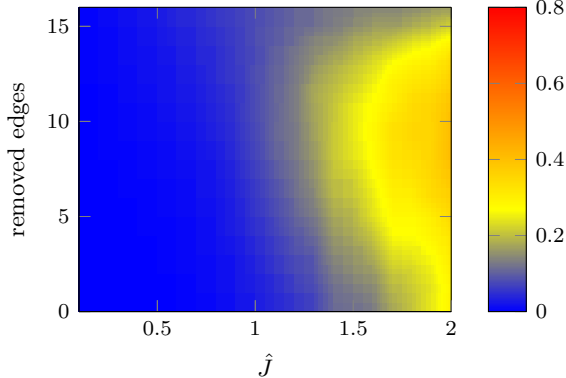

Supplement: supplementary_material [file attachment]

$\theta \in [-0.2, 0.2]$

BETHE-OPT

$l^1$

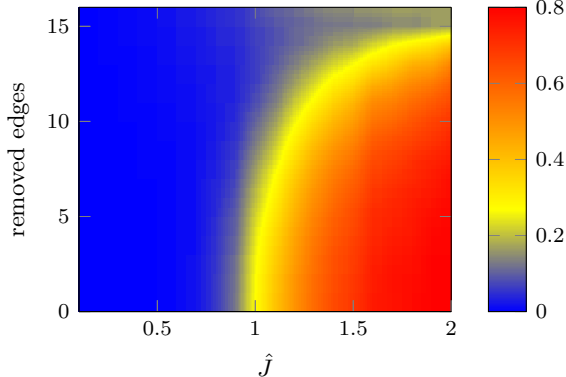

Supplement: supplementary_material [file attachment]

$\theta \in [-0.5, 0.5]$

BETHE-OPT

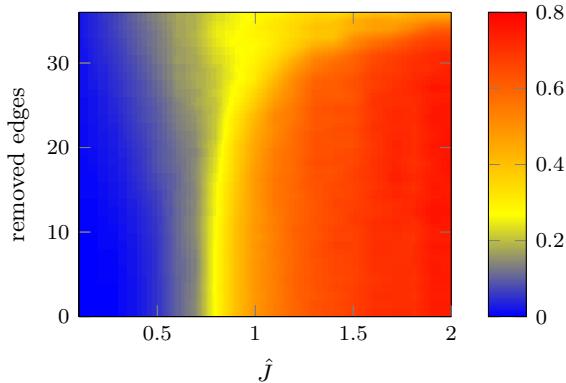

Supplement: supplementary_material [file attachment]

$$\theta \in [-0.5, 0.5]$$

CHOW-LIU

$$l^1$$

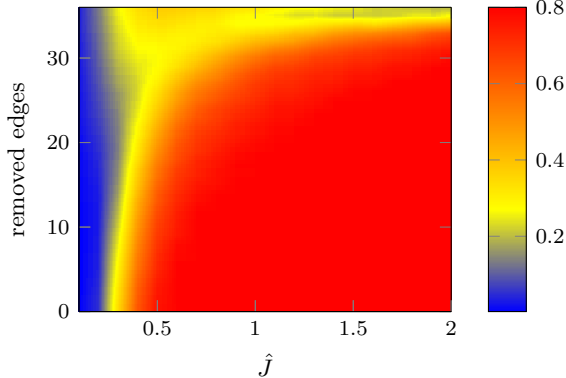

Supplement: supplementary_material [file attachment]

$\theta \in [-0.5, 0.5]$

BETHE-OPT

$l^1$

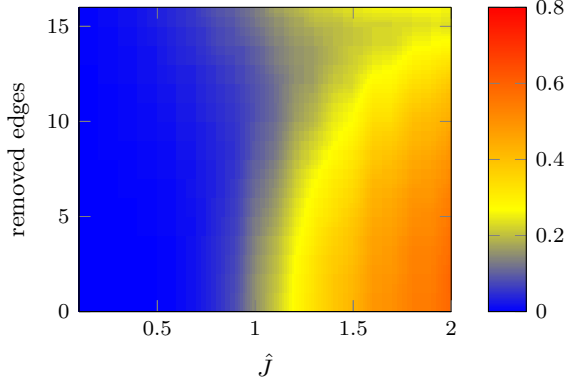

Supplement: supplementary_material [file attachment]

Tree slice,  $\theta \in [-0.2, 0.2]$ 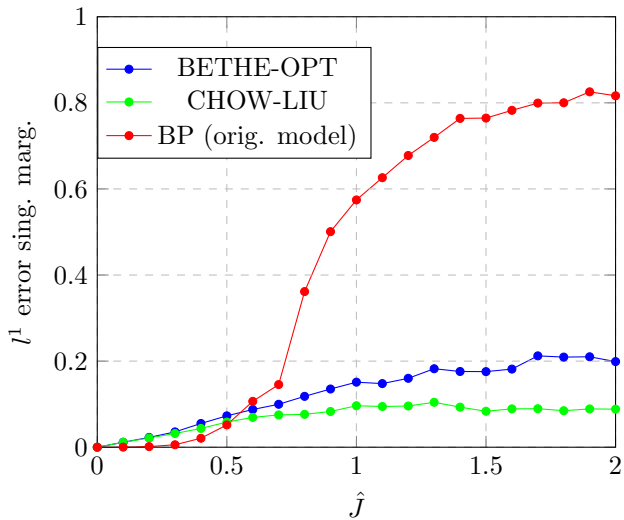Tree slice,  $\theta \in [-0.5, 0.5]$ 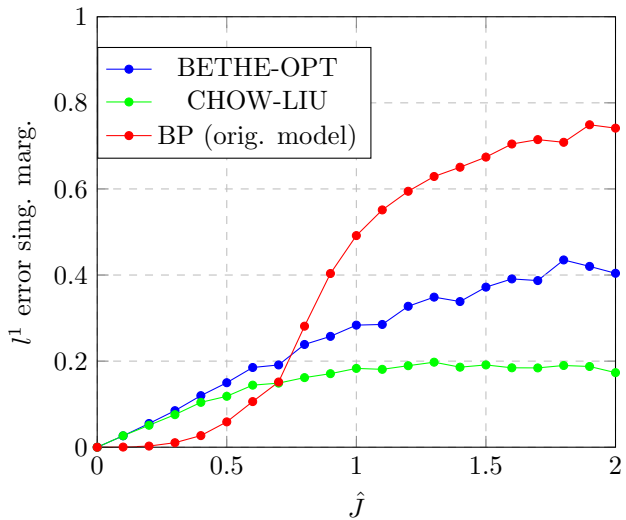

Supplement: supplementary_material [file attachment]

$\theta \in [-0.2, 0.2]$ 

RANDOM

 $l^1$ 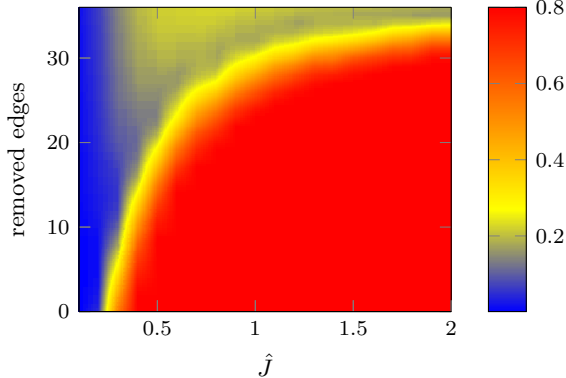

Supplement: supplementary_material [file attachment]

$\theta \in [-0.2, 0.2]$

BETHE-OPT

$l^1$

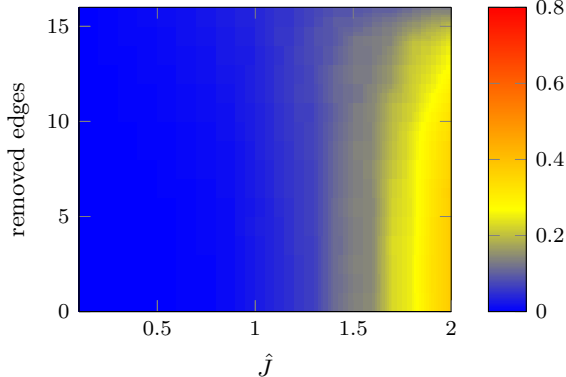

Supplement: supplementary_material [file attachment]

$\theta \in [-0.5, 0.5]$

RANDOM

$l^1$

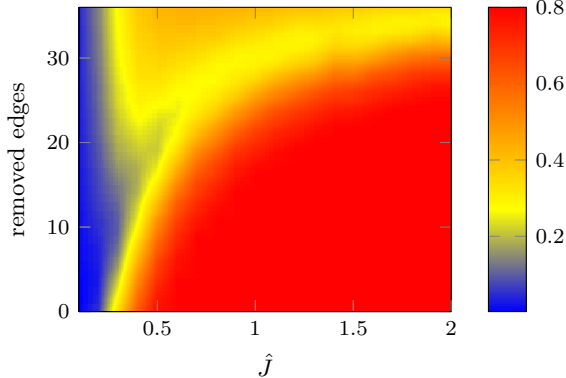

Supplement: supplementary_material [file attachment]

$\theta \in [-0.5, 0.5]$ 

BETHE-OPT

 $l^1$ 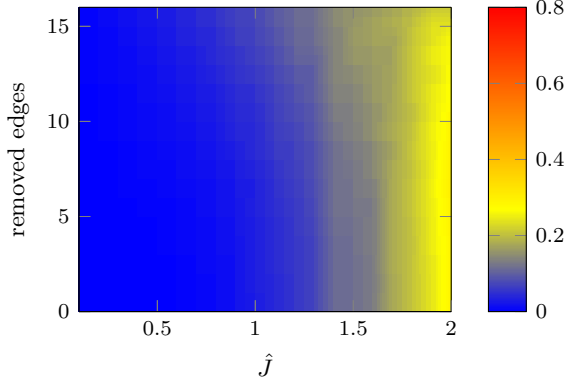

Supplement: supplementary_material [file attachment]

Tree slice,  $\theta \in [-0.2, 0.2]$ 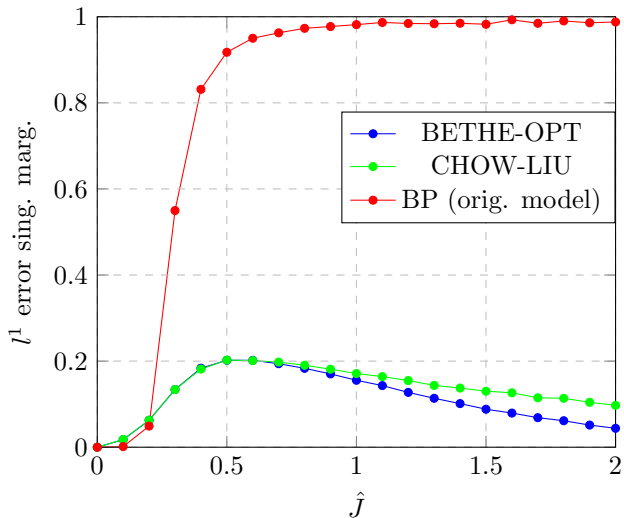Tree slice,  $\theta \in [-0.5, 0.5]$ 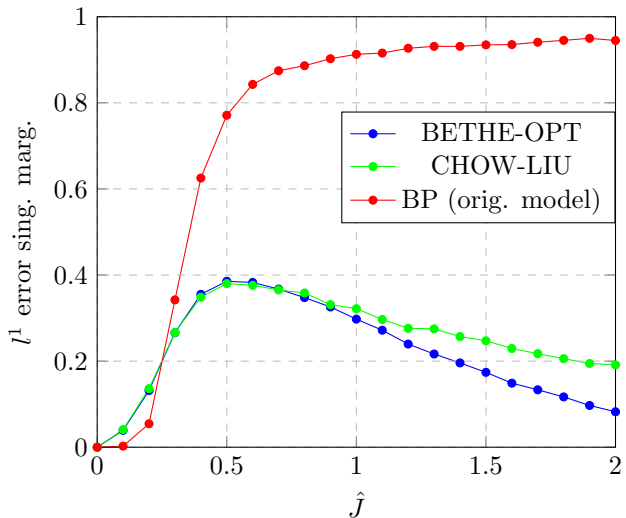

Supplement: supplementary_material [file attachment]

$$\theta \in [-0.5, 0.5]$$

CHOW-LIU

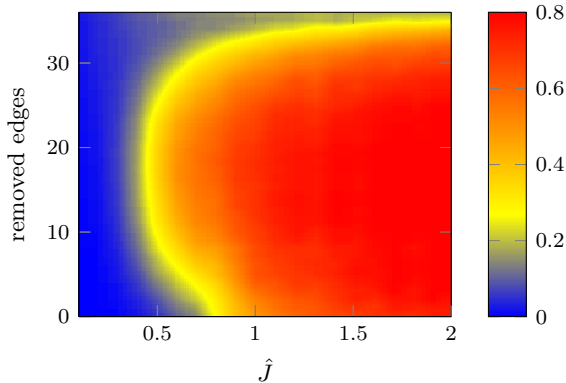

Supplement: supplementary_material [file attachment]
